# Supplementary material for: Factors Associated With the Development of Tinnitus and With the Degree of Annoyance Caused by Newly Developed Tinnitus
Source: PubMed Central journal article supplement — Ear Hear. 2022 Oct 18;43(6):1807–15. doi: 10.1097/AUD.0000000000001250 (PMC9592178; doi:10.1097/aud.0000000000001250), 2022-10-18
Supplement: aud-43-1807-s001.pdf [file aud-43-1807-s001.pdf]

## Supplemental Digital Content

Table 1.

Participant characteristics are described per measurement interval (i.e. T0-T1 and T1-T2). Participants of the T0-T1 and T1-T2 interval were included in the longitudinal analyses on the development of tinnitus. The column “new-onset tinnitus” consists of participants who first reported tinnitus at T1 or T2. This is used for the cross-sectional analysis on tinnitus annoyance. The median with interquartile range is reported for non-normally distributed continuous variables. 4DSQ, four dimensional symptom questionnaire; N, number of participants; IQR, interquartile range; SRT, speech reception threshold; T0, baseline measurement; T1, 5-year follow-up measurement; T2, 10-year follow-up measurement.

| Variable                                         | T0 - T1<br>(N=734) | T1 – T2<br>(N=297) | <i>New-onset<br/>tinnitus (N = 137)</i> |
|--------------------------------------------------|--------------------|--------------------|-----------------------------------------|
| <b>Demographic variables</b>                     |                    |                    |                                         |
| <b>Age N (%)</b>                                 |                    |                    |                                         |
| 18-30 Years                                      | 108 (14.7)         | 19 (6.4)           | 23 (16.8)                               |
| 31-40 Years                                      | 121 (16.5)         | 36 (12.1)          |                                         |
| 41-50 Years                                      | 169 (23.0)         | 62 (20.9)          | 18 (13.1)                               |
| 51-60 Years                                      | 224 (30.5)         | 96 (32.3)          | 37 (27.0)                               |
| 61-71 Years                                      | 112 (15.3)         | 84 (28.3)          | 59 (43.1)                               |
| <b>Sex N (%)</b>                                 |                    |                    |                                         |
| Male                                             | 240 (32.7)         | 116 (39.1)         | 54 (39.4)                               |
| Female                                           | 494 (67.3)         | 181 (60.9)         | 83 (60.7)                               |
| <b>Living arrangement N (%)</b>                  |                    |                    |                                         |
| Living alone                                     | 171 (23.3)         | 65 (21.9)          | 36 (26.3)                               |
| Living with family                               | 559 (76.2)         | 232 (78.1)         | 101 (73.7)                              |
| Missing                                          | 4 (0.5)            | 0                  | 0                                       |
| <b>Educational level N (%)</b>                   |                    |                    |                                         |
| Low                                              | 105 (14.3)         | 36 (12.1)          | 22 (16.1)                               |
| Mid                                              | 222 (30.2)         | 72 (24.2)          | 37 (27.0)                               |
| High                                             | 406 (55.3)         | 189 (63.6)         | 78 (56.9)                               |
| Missing                                          | 1 (0.1)            | 0                  | 0                                       |
| <b>Occupational noise exposure N (%)</b>         |                    |                    |                                         |
| Almost never                                     | 211 (28.7)         | 88 (29.6)          | 27 (19.7)                               |
| Occasionally                                     | 145 (19.8)         | 64 (21.5)          | 31 (22.6)                               |
| Frequently                                       | 92 (12.5)          | 30 (10.1)          | 14 (10.2)                               |
| Almost always                                    | 19 (2.6)           | 7 (2.4)            | 5 (3.6)                                 |
| Not applicable                                   | 267 (36.4)         | 108 (36.4)         | 60 (43.8)                               |
| <b>Speech recognition ability in noise N (%)</b> |                    |                    |                                         |
| Good                                             | 430 (58.6)         | 178 (59.9)         | 79 (57.7)                               |
| Insufficient                                     | 153 (20.8)         | 51 (17.2)          | 22 (16.1)                               |
| Poor                                             | 151 (20.6)         | 68 (22.9)          | 36 (26.3)                               |
| <b>Hyperacusis N (%)</b>                         |                    |                    |                                         |

|                                                            |            |            |             |
|------------------------------------------------------------|------------|------------|-------------|
| Yes                                                        | 209 (28.5) | 75 (25.3)  | 52 (38.0)   |
| No                                                         | 516 (70.3) | 222 (74.7) | 85 (62.0)   |
| Missing                                                    | 9 (1.2)    | 0          | 0           |
| <b>Life style and health variables</b>                     |            |            |             |
| <b>History of tobacco smoking N (%)</b>                    |            |            |             |
| No history of smoking                                      | 327 (44.6) | 144 (48.5) | 54 (39.4)   |
| History of smoking                                         | 407 (55.4) | 153 (51.5) | 83 (60.6)   |
| <b>Alcohol use N (%)</b>                                   |            |            |             |
| No                                                         | 167 (22.8) | 74 (24.9)  | 34 (24.8)   |
| Moderate                                                   | 299 (40.7) | 116 (39.1) | 57 (41.6)   |
| Above moderate                                             | 193 (26.3) | 84 (28.3)  | 35 (25.5)   |
| Heavy                                                      | 55 (7.5)   | 21 (7.1)   | 9 (6.6)     |
| Missing                                                    | 20 (2.7)   | 2 (0.7)    | 2 (1.5)     |
| <b>Asthma N (%)</b>                                        |            |            |             |
| Yes                                                        | 91 (12.4)  | 36 (12.1)  | 15 (10.9)   |
| No                                                         | 642 (87.5) | 261 (87.9) | 122 (89.1)  |
| Missing                                                    | 1 (0.1)    | 0          | 0           |
| <b>Severe heart disease or myocardial infarction N (%)</b> |            |            |             |
| Yes                                                        | 9 (1.2)    | 5 (1.7)    | 8 (5.8)     |
| No                                                         | 721 (98.2) | 292 (98.3) | 129 (94.2)  |
| Missing                                                    | 4 (0.5)    | 0          | 0           |
| <b>Hypertension N (%)</b>                                  |            |            |             |
| Yes                                                        | 105 (14.3) | 50 (16.8)  | 27 (19.7)   |
| No                                                         | 628 (85.6) | 247 (83.2) | 110 (80.3)  |
| Missing                                                    | 1 (0.1)    | 0          | 0           |
| <b>History of stroke N (%)</b>                             |            |            |             |
| Yes                                                        | 2 (0.3)    | 2 (0.7)    | 2 (1.5)     |
| No                                                         | 728 (99.2) | 295 (99.3) | 135 (98.5)  |
| Missing                                                    | 4 (0.5)    | 0          | 0           |
| <b>Diabetes mellitus N (%)</b>                             |            |            |             |
| Yes                                                        | 16 (2.2)   | 11 (3.7)   | 7 (5.1)     |
| No                                                         | 708 (96.5) | 286 (96.3) | 130 (94.9)  |
| Missing                                                    | 10 (1.4)   | 0          | 0           |
| <b>Osteoarthritis N (%)</b>                                |            |            |             |
| Yes                                                        | 93 (12.7)  | 62 (20.9)  | 32 (23.4)   |
| No                                                         | 640 (87.2) | 235 (79.1) | 105 (76.6)  |
| Missing                                                    | 1 (0.1)    | 0          | 0           |
| <b>Rheumatoid arthritis N (%)</b>                          |            |            |             |
| Yes                                                        | 32 (4.4)   | 18 (6.1)   | 6 (4.4)     |
| No                                                         | 697 (95.0) | 279 (93.9) | 131 (95.6)  |
| Missing                                                    | 5 (0.7)    | 0          | 0           |
| <b>Epilepsy N (%)</b>                                      |            |            |             |
| Yes                                                        | 6 (0.8)    | 3 (1.0)    | 0           |
| No                                                         | 718 (97.8) | 294 (99.0) | 137 (100.0) |

|                                                              |            |            |             |
|--------------------------------------------------------------|------------|------------|-------------|
| Missing                                                      | 10 (1.4)   | 0          | 0           |
| <b>Multiple sclerosis N (%)</b>                              |            |            |             |
| Yes                                                          | 1 (0.1)    | 1 (0.3)    | 0           |
| No                                                           | 731 (99.6) | 296 (99.7) | 137 (100.0) |
| Missing                                                      | 2 (0.3)    | 0          | 0           |
| <b>Migraine N (%)</b>                                        |            |            |             |
| Yes                                                          | 27 (3.7)   | 41 (13.8)  | 17 (12.4)   |
| No                                                           | 701 (95.5) | 256 (86.2) | 120 (87.6)  |
| Missing                                                      | 6 (0.8)    | 0          | 0           |
| <b>Distress (4DSQ), median [IQR] (0-32 points scale)</b>     | 6 [2-11]   | 5 [2-10]   | 6 [2-13]    |
| Missing N (%)                                                | 1 (0.1)    | 0          | 0           |
| <b>Somatisation (4DSQ), median [IQR] (0-32 points scale)</b> | 5 [2-9]    | 4 [2-8]    | 8 [3-11]    |
| Missing N (%)                                                | 2 (0.3)    | 0          | 0           |
| <b>Depression (4DSQ), median [IQR] (0-12 points scale)</b>   | 0 [0-1]    | 0 [0-1]    | 0 [0-1]     |
| Missing N (%)                                                | 3 (0.4)    | 0          | 0           |
| <b>Anxiety (4DSQ), median [IQR] (0-24 points scale)</b>      | 0 [0-2]    | 0 [0-1]    | 1 [0-3]     |
| Missing N (%)                                                | 1 (0.1)    | 0          | 0           |

Table 2. Univariable analysis for association with new-onset tinnitus. Note that occupational noise exposure was only analysed in participants who were employed at baseline. 4DSQ, four dimensional symptom questionnaire; CI, confidence interval; n.e., not estimable; OR, odds ratio.

<sup>1</sup>Speech recognition ability was adjusted for transducer type (i.e. speakers or headphones)

<sup>2</sup>No participants affected by this variable developed tinnitus

| <b>Univariable analysis, generalized estimating equations</b> |           |                        |              |
|---------------------------------------------------------------|-----------|------------------------|--------------|
| <b>Variables</b>                                              | <b>OR</b> | <b>95% CI (for OR)</b> | <b>p</b>     |
| <b>Age category</b>                                           |           |                        | 0.39         |
| 31-40 Years                                                   | 1.2       | 0.6 to 2.7             |              |
| 41-50 Years                                                   | 1.3       | 0.6 to 2.7             |              |
| 51-60 Years                                                   | 1.7       | 0.9 to 3.4             |              |
| 61-71 Years                                                   | 1.7       | 0.9 to 3.6             |              |
| <b>Sex (male)</b>                                             | 1.3       | 0.9 to 1.9             | 0.20         |
| <b>Living arrangement (with family)</b>                       | 1.0       | 0.7 to 1.6             | 0.92         |
| <b>Education (high)</b>                                       |           |                        | 0.52         |
| Mid                                                           | 1.2       | 0.8 to 1.7             |              |
| Low                                                           | 1.3       | 0.8 to 2.2             |              |
| <b>Occupational noise exposure (Almost never)</b>             |           |                        | 0.64         |
| Occasionally                                                  | 1.0       | 0.6 to 1.7             |              |
| Frequently                                                    | 1.4       | 0.8 to 2.6             |              |
| Almost always                                                 | 1.2       | 0.4 to 3.9             |              |
| <b>Speech recognition ability in noise<sup>1</sup> (good)</b> |           |                        | 0.36         |
| Insufficient                                                  | 1.3       | 0.9 to 2.1             |              |
| Poor                                                          | 0.9       | 0.6 to 1.6             |              |
| <b>Hyperacusis</b>                                            | 1.5       | 1.1 to 2.3             | <b>0.026</b> |
| <b>History of smoking</b>                                     | 1.5       | 1.1 to 2.2             | <b>0.021</b> |
| <b>Alcohol (none)</b>                                         |           |                        |              |
| Mild                                                          | 0.9       | 0.6 to 1.4             |              |
| Moderate                                                      | 1.2       | 0.7 to 2.0             |              |
| Excessive                                                     | 0.8       | 0.3 to 1.7             |              |
| <b>Asthma</b>                                                 | 0.8       | 0.4 to 1.4             |              |
| <b>Severe heart disease/myocardial infarction</b>             | 0.5       | 0.1 to 3.9             | 0.50         |
| <b>Hypertension</b>                                           | 1.1       | 0.7 to 1.8             | 0.72         |
| <b>Stroke</b>                                                 | 2.2       | 0.2 to 25.4            | 0.53         |
| <b>Diabetes mellitus</b>                                      | 1.5       | 0.5 to 4.2             | 0.44         |
| <b>Osteoarthritis</b>                                         | 1.2       | 0.8 to 2.0             | 0.37         |
| <b>Arthritis of hand or feet</b>                              | 1.3       | 0.6 to 2.8             | 0.56         |
| <b>Epilepsy<sup>2</sup></b>                                   | n.e.      |                        |              |
| <b>Multiple sclerosis<sup>2</sup></b>                         | n.e.      |                        |              |
| <b>Migraine</b>                                               | 2.0       | 1.1 to 3.6             | <b>0.030</b> |
| <b>Distress (4DSQ), 1<sup>st</sup> quartile (score 0-2)</b>   |           |                        | 0.45         |
| 2 <sup>nd</sup> quartile (score 3-5)                          | 1.1       | 0.6 to 1.9             |              |

|                                                                 |     |            |              |
|-----------------------------------------------------------------|-----|------------|--------------|
| 3rd quartile (score 6-10)                                       | 1.2 | 0.7 to 1.9 |              |
| 4 <sup>th</sup> quartile (score 11-32)                          | 1.5 | 0.9 to 2.4 |              |
| <b>Somatization (4DSQ), 1<sup>st</sup> quartile (score 0-2)</b> |     |            | <b>0.019</b> |
| 2 <sup>nd</sup> quartile (score 3-4)                            | 1.0 | 0.6 to 1.8 |              |
| 3rd quartile (score 5-8)                                        | 1.3 | 0.8 to 2.1 |              |
| 4 <sup>th</sup> quartile, score 9-29                            | 2.0 | 1.2 to 3.3 |              |
| <b>Depression (4DSQ), score 0</b>                               |     |            | 0.40         |
| Score 1-2                                                       | 0.9 | 0.5 to 1.5 |              |
| Score 3-12                                                      | 1.4 | 0.8 to 2.3 |              |
| <b>Anxiety (4DSQ) (score 0)</b>                                 |     |            | 0.76         |
| Score 1                                                         | 0.9 | 0.5 to 1.4 |              |
| Score 2-24                                                      | 1.1 | 0.7 to 1.6 |              |

Table 3. Factors analysed for association with tinnitus annoyance (0-100 scale).  $\beta$  Is the regression coefficient of the independent variable. 4DSQ = four dimensional symptom questionnaire; CI, confidence interval; n.e., not estimable.

<sup>1</sup>Speech recognition ability was adjusted for transducer type (i.e. speakers or headphones)

<sup>2</sup>No participants affected by this variable developed tinnitus

| <b>Univariable linear regression</b>                            |                           |                                        |                 |
|-----------------------------------------------------------------|---------------------------|----------------------------------------|-----------------|
| <b>Variables</b>                                                | <b><math>\beta</math></b> | <b>95% CI (for <math>\beta</math>)</b> | <b><i>p</i></b> |
| <b>Male</b>                                                     | 1.6                       | -6.3 to 9.4                            | 0.69            |
| <b>Age (18-40 years)</b>                                        |                           |                                        | 0.48            |
| 41-50 years                                                     | 4.3                       | -9.8 to 18.4                           |                 |
| 51-60 years                                                     | 9.3                       | -2.6 to 21.1                           |                 |
| 61-80 years                                                     | 4.3                       | -6.7 to 15.3                           |                 |
| <b>Living arrangement (with family)</b>                         | 1.5                       | -7.2 to 10.2                           | 0.73            |
| <b>Education (high)</b>                                         |                           |                                        | <b>0.034</b>    |
| Mid                                                             | 3.6                       | -5.2 to 12.3                           |                 |
| Low                                                             | 14.1                      | 3.5 to 24.6                            |                 |
| <b>Occupational noise exposure (Almost never)</b>               |                           |                                        | 0.44            |
| Occasionally                                                    | -1.6                      | -10.9 to 7.7                           |                 |
| Frequently                                                      | -10.8                     | -23.6 to 2.0                           |                 |
| Almost always                                                   | -9.6                      | -30.1 to 10.9                          |                 |
| <b>Speech recognition ability in noise<sup>1</sup> (good)</b>   |                           |                                        | <b>0.008</b>    |
| Insufficient                                                    | -0.4                      | -10.9 to 10.1                          |                 |
| Poor                                                            | 13.8                      | 4.8 to 22.7                            |                 |
| <b>Hyperacusis</b>                                              | 6.7                       | -1.1 to 14.5                           | 0.091           |
| <b>History of smoking</b>                                       | 5.6                       | -5.4 to 10.4                           | 0.52            |
| <b>Asthma</b>                                                   | 0.1                       | -12.2 to 12.3                          | 0.99            |
| <b>Severe heart disease/myocardial infarction</b>               | -0.2                      | -16.5 to 16.1                          | 0.98            |
| <b>Hypertension</b>                                             | -1.3                      | -10.9 to 8.3                           | 0.79            |
| <b>Stroke</b>                                                   | 11.9                      | -19.9 to 4.7                           | 0.46            |
| <b>Diabetes mellitus</b>                                        | 2.2                       | -15.2 to 19.5                          | 0.81            |
| <b>Osteoarthritis</b>                                           | 10.5                      | 1.6 to 19.3                            | <b>0.021</b>    |
| <b>Arthritis</b>                                                | -7.8                      | -26.4 to 10.8                          | 0.41            |
| <b>Epilepsia<sup>2</sup></b>                                    | n.e.                      |                                        |                 |
| <b>Multiple sclerosis<sup>2</sup></b>                           | n.e.                      |                                        |                 |
| <b>Migraine</b>                                                 | 10.6                      | -0.9 to 22.0                           | 0.070           |
| <b>Distress (4DSQ), 1<sup>st</sup> quartile (score 0-2)</b>     |                           |                                        | 0.29            |
| 2 <sup>nd</sup> quartile (score 3-6)                            | 0.7                       | -9.6 to 11.1                           |                 |
| 3 <sup>rd</sup> quartile (score 7-13)                           | 5.1                       | -5.9 to 16.2                           |                 |
| 4 <sup>th</sup> quartile (score 14-32)                          | 9.3                       | -1.5 to 20.1                           |                 |
| <b>Somatization (4DSQ), 1<sup>st</sup> quartile (score 0-2)</b> |                           |                                        | <b>0.039</b>    |
| 2 <sup>nd</sup> quartile, (score 3-7)                           | -6.0                      | -16.7 to 4.6                           |                 |
| 3 <sup>rd</sup> quartile (score 8-11)                           | 2.9                       | -7.3 to 13.1                           |                 |
| 4 <sup>th</sup> quartile (score 12-32)                          | 10.0                      | -1.1 to 2.2                            |                 |

|                                   |      |              |              |
|-----------------------------------|------|--------------|--------------|
| <b>Depression (4DSQ), score 0</b> |      |              | 0.43         |
| Score 1-2                         | -2.8 | -12.6 to 7.0 |              |
| Score 3-12                        | 5.6  | -5.2 to 16.4 |              |
| <b>Anxiety (4DSQ) (score 0)</b>   |      |              | <b>0.019</b> |
| Score 1-2                         | 11.2 | 1.8 to 20.5  |              |
| Score 3-24                        | 10.3 | 1.4 to 19.2  |              |
